26

27 **Abstract**

28 Nucleic acid amplification for the detection of SARS-CoV-2 RNA in respiratory  
29 samples is the standard method for diagnosis. These tests are centralised and  
30 therefore turnaround times can be 2-5 days. Point-of-care testing with rapid  
31 turnaround times would allow more effective triage in settings where patient  
32 management and infection control decisions need to be made rapidly.

33 Inclusivity and specificity of the SAMBA II SARS-CoV-2 assay was determined by *in*  
34 *silico* analyses of the primers and probes. Analytical and clinical sensitivity and  
35 specificity of the SAMBA II SARS-CoV-2 Test was evaluated for analytical sensitivity  
36 and specificity. Clinical performance was evaluated in residual clinical samples  
37 compared to the Public Health England reference tests.

38 The limit of detection of the SAMBA II SARS-CoV-2 Test is 250 cp/mL and is specific  
39 for detection of 2 regions of the SARS-CoV-2 genome. The clinical sensitivity was  
40 evaluated in 172 clinical samples provided by the Clinical Microbiology and Public  
41 Health Laboratory, Addenbrooke's Hospital, Cambridge (CMPHL), which showed a  
42 sensitivity of 98.9% (95% CI 94.03-99.97%), specificity of 100% (95% CI 95.55-100%),  
43 PPV of 100% and NPV of 98.78% (92.02-99.82%) compared to testing by  
44 CMPHLSAMBA detected 3 positive samples that were initially negative by PHE Test.

45 The data shows that the SAMBA II SARS-CoV-2 Test performs equivalently to the  
46 centralised testing methods with a much quicker turnaround time. Point of care testing,  
47 such as SAMBA, should enable rapid patient management and effective  
48 implementation of infection control measures.

49

50

51

## 52 **Introduction**

53 The SARS-CoV-2 was first reported in Wuhan, China, in early December 2019 and is  
54 the causative agent of coronavirus disease 19 (COVID-19) [1]. It has since spread to  
55 over 188 countries/regions around the world [2], causing 317,234 deaths [3]. It was  
56 declared a pandemic by the World Health Organisation on the 11th of March 2020 [4].  
57 In Europe, the country with the highest number of deaths is UK, which as of the 17<sup>th</sup>  
58 of May has had 243,694 lab-confirmed cases and 34,636 deaths in all settings [5].  
59 Nucleic acid testing is essential for early diagnosis of SARS-CoV-2 infection as  
60 antibody response is often not detected until 7-10 post onset of symptoms [6]. Upper  
61 respiratory tract (URT) specimens such as nose and throat swabs generally have high  
62 SARS-CoV-2 viral loads upon symptom onset [7]. The standard diagnostic test for  
63 SARS-CoV-2 in the UK is done by real-time RT-PCR of the RdRp gene [8], from a  
64 combined throat and nose swab sample. The UK has dramatically scaled up testing  
65 from 5,000 tests per day in March 2020 to 100,000 tests per day by the end of April.  
66 Although this test has good accuracy, the samples must be transported to centralized  
67 testing laboratories and batched for processing, which leads to turnaround times of  
68 around 48 hours or more. This means treatment of severely ill patients may be  
69 suboptimal when other causative pathogens are in the differential diagnosis and those  
70 requiring admission or triage with possible COVID-19 maybe unnecessarily isolated  
71 or inappropriately cohorted in a COVID-19 ward. This causes obvious bottlenecks in  
72 addition to the sheer number of samples that require processing; at present hospital  
73 and regional laboratories are at full capacity and a rapid point of care (POC) testing is  
74 required.

75 The SAMBA II nucleic acid testing system was originally designed for HIV testing in

76 POC and resource-limited settings, with CE-marked products for early infant diagnosis  
77 [9,10] and viral load monitoring [11-13]. Since 2017, SAMBA HIV tests have been  
78 implemented in Uganda, Malawi, Zimbabwe and Central African Republic. The  
79 SAMBA II SARS-CoV-2 Test system has now been developed to specifically detect  
80 the presence of the novel coronavirus, SARS-CoV-2, in nose and throat swab samples  
81 run on the SAMBA II instrument. Test results are available in approximately 1.5 hours.  
82 We have here assessed the analytical and clinical performance of the SAMBA II  
83 SARS-CoV-2 Test using panels and clinical samples.

84

## 85 **Materials and Methods**

### 86 **SAMBA sample preparation, amplification, and detection**

87 For the SAMBA II system, sample preparation, amplification, and detection as well as  
88 reading and interpretation of the results are fully automated. The test is carried out in  
89 the SAMBA II Assay Module under the control of the SAMBA II Tablet Module as  
90 previously described for HIV [9-12], according to the manufacturer's instructions for  
91 use. Nose and throat swab samples are preferably resuspended in 2 mL of SAMBA  
92 SCoV buffer but the system can be used with viral transport medium (VTM) if the  
93 sample is diluted 1:2 with SCoV buffer prior to processing. The input volume for the  
94 SAMBA test is 300  $\mu$ l of which 250  $\mu$ l is used by the SAMBA II machine as input into  
95 the sample preparation. The SAMBA II SARS-CoV-2 Test specifically amplifies and  
96 detects two regions of the SARS-CoV-2 genome in the ORF1ab (region 1) and  
97 nucleocapsid protein (region 2), reported as two distinct lines on the test strip. A third  
98 line on the test strip, the internal control, is present to control for false negatives  
99 caused by instrument/reagent problems or inhibition. The presence of one or both test  
100 lines indicates a positive result. The presence of just the internal control line indicates

101 a negative result.

## 102 **Virus inactivation in SAMBA SCoV buffer**

103 SAMBA SCoV buffer, containing Triton x100, is provided with the SAMBA II SARS-  
104 CoV-2 Test for sample collection of the nose and throat swabs. Single round of VSV-  
105 G pseudotyped lentiviruses were produced by transfecting HEK-293T cells in a 3-  
106 plasmid transfection system (HIV Gag-pol expresser under a CMV promoter,  
107 luciferase genome reporter and VSV-g envelope) as previously described [14]. Virus  
108 supernatant was harvested after 24 hours and filtered. Fifty (50)  $\mu\text{L}$   
109 of pseudovirus preparation was added to increasing dilutions of SAMBA SCoV Buffer  
110 in duplicates and incubated at room temperature for 5 minutes. 100 $\mu\text{L}$  of the virus-  
111 reagent prep was then used to infect  $1.0 \times 10^6$  TZMbl target cells per well in a 96-well  
112 plate and incubated at 37°C, 5% CO<sub>2</sub>. Forty-eight (48) hours post-infection, luciferase  
113 expression was measured using SteadyGlo and a Glomax Luminometer (both  
114 Promega).

115

## 116 ***In silico* inclusivity analysis**

117 The SAMBA-SARS-CoV-2 primers and probes for Orf1ab and N regions were  
118 individually evaluated using *in-silico* analysis with respect to 157 SARS-CoV-2  
119 sequences in the NCBI database.

120

## 121 ***In silico* specificity analysis**

122 *In silico* analysis for possible cross-reactions with related human Coronaviruses  
123 (Human coronavirus 229E, Human coronavirus OC43, Human coronavirus HKU1,  
124 Human coronavirus NL63, SARS-coronavirus and MERS-coronavirus) was conducted

125 by mapping primers in the SAMBA II SARS-CoV-2 Test individually to the sequences  
126 downloaded from the NCBI database.

127 An *in silico* analysis for possible cross-reactions with other high-priority organisms was  
128 conducted by carrying out a blastn search for each of the SAMBA primers and probes  
129 against NCBI databases and retrieving all sequences with homologies > 80%.

130

### 131 **Panels and samples**

132 Panel members for determination of the limit of detection (LOD) were prepared by  
133 making serial dilutions of SARS-CoV-2 RNA from strain 2019-nCoV/Italy-INMI1 from  
134 EVAg (code number: 008N-03894) in pooled negative combined nose and throat  
135 swab samples to target concentrations of 750, 500, 250, 200, 150 and 100  
136 copies/mL.

137 A Coronavirus RNA specificity panel containing hCoV-NL63, hCoV-229E, hCoV-  
138 OC43, MERS-CoV and SARS-CoV HKU339849 were sourced from EVAg (code  
139 number 011N-03868). RNA samples from this panel were tested at >100,000 cp/test  
140 in the SAMBA II test to determine specificity against other human Coronaviruses.

141

### 142 **Contrived clinical samples**

143 Combined nose and throat swabs were collected from 35 presumed negative  
144 individuals using FLOQSwabs (Copan, Italy) and SAMBA SCoV buffer. Thirty  
145 contrived positive clinical samples were prepared by spiking known concentrations of  
146 SARS-CoV-2 RNA strain 2019-nCoV/Italy-INMI1 (EVAg, Italy) into individual negative  
147 specimens to produce final concentrations of 1x LoD (n=3), 2x LoD (n=17), 3x LoD  
148 (n=5), 5x LoD (n=3) and 100x LoD (n=2).

149

## 150 **Clinical evaluation**

151 The clinical performance of the SAMBA II SARS-CoV-2 Test was further evaluated  
152 retrospectively with 172 residual blinded combined nose and throat swab samples  
153 from CMPHL Cambridge laboratory. These residual samples were from symptomatic  
154 individuals with suspected Covid-19 from around the East of England region sent for  
155 routine laboratory diagnosis and provided as VTM diluted 1:2 with SAMBA SCoV  
156 buffer. In total 172 samples were tested by the SAMBA II SARS-CoV-2 Test and  
157 results were compared to the Cambridge RdRp gene (Wuhan) assay on the Rotor  
158 gene Q real-time PCR assay routinely used by CMPHL based on the publication by  
159 Sridhar et al., 2020 [15]. Results are expressed as positive or negative with a Ct cut  
160 off of 36 for positive results. Samples were also tested with the PHE Colindale  
161 (Reference Laboratory) assay, based on the publication by Corman et al, 2020 [8],  
162 which amplifies a different region of the RdRp gene.

163 For LOD, we used SARS-CoV-2 RNA quantified in cp/mL but in the clinical samples,  
164 SAMBA II results were compared to real-time PCR results expressed as Ct number  
165 (number of cycles). By systematically testing serial dilutions of samples calibrated in  
166 cp/mL by the PHE test a correspondence curve was drawn showing for instance that  
167 25 Ct corresponded to 100,000 cp/mL and 30 Ct to 1,000 cp/mL. The curve obtained  
168 is added as supplementary information.

169

## 170 **Research Ethics**

171 Surplus samples obtained from patients known to be symptomatic for COVID-19 and  
172 submitted to the CMPHL for routine testing were retrieved before being discarded.  
173 These samples were rendered anonymous and provided blinded for the purpose of  
174 test validation. Public Health England and NHS Research Ethics Committee have

175 permitted the use of residual samples in this manner, strictly for the purpose of  
176 diagnostic assay validation [16]. The evaluation was carried out in accordance with  
177 The Use of Human Organs and Tissue act [17].

178

## 179 **Results**

### 180 **Viral inactivation by SAMBA SCoV collection buffer**

181 Due to the highly infectious nature of SARS-CoV-2, a proprietary buffer which has a  
182 low pH and a strong detergent was developed for the SAMBA SARS-CoV-2 Test for  
183 sample collection. The ability of the SAMBA SCoV Buffer to inactivate pseudoviruses  
184 was assessed by incubating pseudoviruses with increasing dilutions of  
185 SAMBA SCoV Buffer in duplicates at room temperature for 5 minutes. Forty-eight (48)  
186 hours post-infection, luciferase expression was measured. Figure 1 shows the plot of  
187  $\log_{10}$  relative light units (RLU) of luciferase expression vs concentration of  
188 SAMBA SCoV Buffer containing Triton X100. Results show that luciferase activity was  
189 insignificant up to 1:128 dilution of the SAMBA SCoV Buffer, indicating that  
190 the pseudovirus was inactivated after 5-minute exposure at room temperature (Figure  
191 1). For the SAMBA II Test, a 10-minute soaking of the swab in the  
192 SAMBA SCoV Buffer is recommended.

193

### 194 **Limit of detection**

195 The limit of detection (LOD) of the SAMBA II SARS-CoV-2 Test was determined using  
196 serial dilutions of SARS-CoV-2 RNA in pooled negative combined nose and throat  
197 swab samples. The initial LOD was determined by testing 6 levels at target  
198 concentrations of 750, 500, 250, 200, 150 and 100 copies/mL. Each panel member  
199 was tested in replicates of 3 (Table 1). The final LOD was confirmed by testing 250



200 copies/mL in replicates of 20, of which all were detected. The results are summarized  
201 in Table 1. Therefore, the claimed LOD of the SAMBA II SARS-CoV-2 Test is 250  
202 cp/mL.

203

#### 204 **Inclusivity**

205 The SAMBA II SARS-CoV-2 Test primers and probes for Target 1 (Orf 1ab) had 100%  
206 match to all but one available SARS-CoV-2 sequence for this region in the NCBI  
207 database (n=157). For this one sequence, a single nucleotide mismatch was found  
208 that maps to the capture probe with no predicted impact on the assay performance.  
209 The primers and probes for Target 2 (N) had 100% identity to all available SARS-CoV-  
210 2 sequences for this region in the NCBI database (n=157).

211

#### 212 **Specificity analysis**

213 *In silico* analysis for possible cross-reactions with related human coronaviruses  
214 (Human coronavirus 229E, Human coronavirus OC43, Human coronavirus HKU1,  
215 Human coronavirus NL63, SARS-coronavirus and MERS-coronavirus) concluded that  
216 none of the SAMBA primers had >80% homology to the organisms listed. In addition  
217 to *in silico* analysis, the SAMBA II SARS-CoV-2 Test was evaluated for specificity by  
218 using >100,000 cp/test of hCoV-NI63, hCoV-229E, hCoV-OC43, MERS-CoV and  
219 SARS-CoV RNA as target in the assay. All samples gave negative results in SAMBA  
220 showing that both the Orf1ab and N primers and probes in the SAMBA II SARS-CoV-  
221 2 were specific.

222 An *in silico* analysis for possible cross-reactions with other high-priority organisms  
223 showed that only one SAMBA probe (N region) had greater than 80% homology (81%)  
224 to one of the high priority organisms (*Pneumocystis jirovecii* [PJP]). This marginal

225 homology would not impact the performance of the test because the other primers and  
226 probes have no homology to *P. jirovecii*. This homology would not be able to compete  
227 with 100% homology of the SARS-CoV-2 amplicon to the capture probe.

228

### 229 **Contrived clinical specimens**

230 Positive (n=30) and negative (n=35) swab samples were contrived from individual  
231 nose and throat swab samples collected from 35 individuals and tested with the  
232 SAMBA II SARS-CoV-2 Test. Spiked positive samples were tested at 1x LOD (n=3),  
233 2x LOD (n=17), 3x LOD (n=5), 5x LOD (n=3) and 100x LOD (n=2) by spiking SARS-  
234 CoV-2 RNA into individual negative swab samples. All 35 negative samples were  
235 negative and all 30 spiked positive samples were positive when tested with the  
236 SAMBA II SARS-CoV-2 Test (Table 2). The overall sensitivity was 100% (95%CI:  
237 88.43-100%) and specificity was 100% (95%CI: 90-100%).

238

### 239 **Clinical evaluation**

240 The clinical performance of the SAMBA II SARS-CoV-2 Test was further evaluated  
241 with 172 combined nose and throat samples from symptomatic individuals provided  
242 blinded by CMPHL. The samples were provided in Viral Transport Medium (VTM)  
243 diluted 1:2 with SAMBA SCoV buffer. After initial testing there were 87 concordant  
244 positives, 81 concordant negatives and 4 discrepant results (3 SAMBA positive and  
245 one SAMBA negative) compared with the PHE Colindale reference laboratory test  
246 (Table 3). The three SAMBA positive samples were repeat positive by SAMBA and on  
247 retest by CMPHL they were found to be borderline positive with high CT values for at  
248 least one of the target genes on the Colindale or Cambridge (Wuhan) test (Table 4).  
249 The one SAMBA negative sample was negative on repeat by SAMBA but was positive

250 by PHE for RdRp using both the Cambridge (Wuhan) and Colindale assays, with Ct  
251 values of 28.87 and 31.18 respectively (Table 4). Therefore, there was just 1  
252 discrepant sample after retest, a false negative for SAMBA (Table 5). From this data  
253 set the SAMBA II SARS-CoV-2 Test has a sensitivity of 98.9% (95% CI 94.03-  
254 99.97%), specificity of 100% (95% CI 95.55-100%), PPV of 100% and NPV of 98.78%  
255 (92.02-99.82%) when compared to the PHE reference tests. The one SAMBA false  
256 negative gave a high Ct value on the PHE test (>31), suggesting low viral load, and it  
257 was diluted (1:2) for SAMBA testing, which may explain the false-negative result.

258

## 259 **Discussion**

260 POC molecular tests for SARS-CoV-2, such as SAMBA II, are required to quickly  
261 triage patients as centralised testing can take 2-5 days for results. In addition, POC  
262 tests would be extremely useful for non-laboratory residential settings such as prisons,  
263 immigration centres, nursing homes and rehabilitative centres. The people living in  
264 such facilities tend to be vulnerable populations who are at a higher risk for adverse  
265 outcome and for infection due to living in close proximity to others [18] and early  
266 identification and implementation of increased infection control measures would  
267 reduce spread amongst residents and staff. POC would also be extremely useful in  
268 other situations where rapid and accurate results are required e.g organ donation,  
269 hospital admissions and emergency surgery. POC molecular tests with rapid  
270 turnaround, such as SAMBA II, will be essential not only during high rates of infection  
271 but also as the country begins to end the lockdown period and localised outbreaks will  
272 need to be managed quickly and efficiently.

273 Our data shows that the SAMBA II SARS-CoV-2 Test is equivalent to centralised  
274 testing with excellent sensitivity and specificity. Samples are inactivated in the SAMBA

275 collection buffer and results are available within 86-101 minutes at the POC. High  
276 sensitivity and specificity are essential for the appropriate triaging and treatment of  
277 incoming patients. The assay has a limit of detection of 250 cp/mL, which is in-line  
278 with that claimed by other commercial SARS-CoV-2 tests [19,20]. The specificity of  
279 the SAMBA SARS-CoV-2 Test in clinical samples was 100% and the sensitivity was  
280 98.9% compared to the centralised molecular testing by CMPHL. This data includes 3  
281 positive samples detected by SAMBA that were original negative by centralised testing  
282 indicating good sensitivity. Clinical evaluation by Zhen et al [21] comparing the  
283 performance of Xpert® Xpress SARS-CoV-2 (Cepheid), ePlex® SARS-CoV-  
284 2 (GenMark) and ID NOW™ COVID-19 (Abbott) showed limit of detection of 100  
285 cp/mL, 1,000 cp/mL and 10,000 cp/mL and clinical agreement with the reference  
286 standard of 98.3%, 91.4% and 87.7% respectively. In another study the Xpert system  
287 has been shown to have good agreement with the reference test over a wide range of  
288 Ct values, including low positives [22,23] with a positive agreement of 98.9% and  
289 negative agreement of 92.0% compared to Roche cobas [22]. The Abbott ID NOW  
290 has been shown to have a positive agreement of 73.9% (95% CI: 63.2-82.3%) and  
291 negative agreement of 100% (95%CI: 92.9-100%) compared to the lab-based Roche  
292 cobas system, with the majority of false negative samples being low viral load (>30 Ct  
293 cycles by Roche cobas) [22]. Abbott have since modified the instructions for use to  
294 remove the use of swab in transport medium as samples may become too dilute and  
295 affect the sensitivity [24].

296 Potential limitations of this study include that the virus inactivation study was carried  
297 out using a constructed pseudovirus rather than a SARS-CoV-2 or other coronavirus  
298 due to availability. Also clinical samples were collected in VTM and diluted 1:2 in SCoV  
299 buffer rather than collected directly into SCoV buffer, which may affect the sensitivity.

300

## 301 **Acknowledgements**

302 RKG is funded by Wellcome Senior Fellowship In Clinical Science award no WT108082AIA

303

## 304 **References**

- 305 1. Huang C, Wang Y, Li X, Ren L, Zhao J, Hu Y, Zhang L, Fan G, Xu J, Gu X,  
306 Cheng Z, Yu T, Xia J, Wei Y, Wu W, Xie X, Yin W, Li H, Liu M, Xiao Y, Gao H,  
307 Guo L, Xie J, Wang G, Jiang R, Gao Z, Jin Q, Wang J, Cao B. 2020. Clinical  
308 features of patients infected with 2019 novel coronavirus in Wuhan, China.  
309 Lancet 395(10223):497-506.
- 310 2. COVID-19 Dashboard by the Center for Systems Science and Engineering  
311 (CSSE) at John Hopkins University (JHU). ArcGIS. John Hopkins University.  
312 (Accessed 18<sup>th</sup> May 2020).
- 313 3. <https://www.worldometers.info/coronavirus/> (Accessed 18<sup>th</sup> May 2020).
- 314 4. World Health Organisation. 2020. WHO Director-General's opening remarks at  
315 the media briefing on COVID-19 - 11 March 2020. Available from:  
316 [https://www.who.int/dg/speeches/detail/who-director-general-s-opening-  
317 remarks-at-the-media-briefing-on-covid-19---11-march-2020](https://www.who.int/dg/speeches/detail/who-director-general-s-opening-remarks-at-the-media-briefing-on-covid-19---11-march-2020). (Accessed 10<sup>th</sup>  
318 May 2020)
- 319 5. <https://coronavirus.data.gov.uk> (Accessed 18<sup>th</sup> May 2020).
- 320 6. Grzelak L, Temman S, Plachais C, Grzelak L, Temmam S, Planchais C,  
321 Demeret C, Huon C, Guivel F, Staropoli I, Chazal M, Dufloo J, Planas  
322 D, Buchrieser J, Rajah MM, Robinot R, Porrot F, Albert M, Chen K,  
323 Crescenzo B, Donati F, Anna F, Souque P, Gransagne M, Bellalou J,  
324 Nowakowski M, Backovic M, Bouadma I, Le Fevre L, Le Hingrat

- 325 Q, Descamps D, Pourbaix A, Yazdanpanah Y, Tondeur L, Besombes C,  
326 Ungeheuer M, Mellon G, Morel P, Rolland S, Rey F, Behillil S, Enouf  
327 V, Lemaitre A, Creach M, Petres S, Escriou N, Charneau P, Fontanet A, Hoen  
328 B, Bruel T, Eloit M, Mouquet H, Schwartz O, van der Werf S. 2020. SARS-  
329 CoV-2 serological analysis of COVID-19 hospitalized patients, pauci-  
330 symptomatic individuals and blood donors. medRxiv  
331 <https://doi.org/10.1101/2020.04.21.20068858>
- 332 7. Pan Y, Zhang D, Yang P, Poon LIM, Wang Q. 2020. Viral load of SARS-CoV-2  
333 in clinical samples. *The Lancet*. 20(4):411-412.
- 334 8. Corman, VM, Landt O, Kaiser M, Molenkamp R, Meijer A, Chu DKW, Bleicker  
335 T, Brnink S, Schneider J, Schmidt ML, Mulders DGJC, Haagmans BL, van der  
336 Veer B, van den Brink S, Wijsman L, Goderski G, Romette J-L, Ellis J, Zambon  
337 M, Peirlis M, Goossens H, Reusken C, Koopmans MPG, Drosten C. 2020.  
338 Detection of 2019 novel coronavirus (2019-nCoV) by real-time RT-PCR. *Euro*  
339 *Surveill*, 25(3) <https://doi.org/10.2807/1560-7917.ES.2020.25.3.2000045>
- 340 9. Ritchie AV, Goel N, Sembongi H, Lehga J, Farleigh LE, Edemaga D,  
341 Wisniewski CA, Lee HH.(2016. Performance evaluation of the point-of-care  
342 SAMBA I and II HIV-1 Qual whole blood tests. *J Virol Methods*. Nov;237:143-  
343 149.
- 344 10. Ondiek J, Namukaya Z, Mtapuri-Zinyowera S, Balkan S, Elbireer A, Ushiro  
345 Lumb I, Kiyaga C, Goel N, Ritchie A, Ncube P, Omuomu K, Ndiege K,  
346 Kekitiinwa A, Mangwanya D, Fowler MG, Nadala L, Lee H. 2017. Multi-  
347 country validation of SAMBA – A novel molecular point-of-care test for HIV-1  
348 detection in resource-limited setting. *J Acquir Immune Defic Syndr*. Oct  
349 1;76(2):e52-e57.

- 350 11. Ritchie AV, Ushiro-Lumb I, Edemaga D, Joshi HA, De Ruiter A, Szumilin E,  
351 Jendrulek I, McGuire M, Goel N, Sharma PI, Allain JP, Lee HH. 2014. SAMBA  
352 HIV semiquantitative test, a new point-of-care viral-load-monitoring assay for  
353 resource-limited settings. *J Clin Microbiol.* 52(9):3377-83.
- 354 12. Goel N, Ritchie AV, Mtapuri-Zinyowera S, Zeh C, Stepchenkova T, Lehga J,  
355 De Ruiter A, Farleigh LE, Edemaga D, So R, Sembongi H, Wisniewski C,  
356 Nadala L, Schito M, Lee H. 2017. Performance of the SAMBA I and II HIV-1  
357 Semi-Q Tests for viral load monitoring at the point-of-care. *J Virol Methods.*  
358 Jun;224:39-45.
- 359 13. Titchmarsh L, Zeh, C, Verpoort T, Allain, J-P and Lee, H.2015. Leukodepletion  
360 as a Point-of-Care Method for Monitoring HIV-1 Viral Load in Whole Blood. *J. Clin.*  
361 *Microbiol.*53(4):1080-1086.
- 362 14. Gupta RK, Kohli A, McCormick AL, Towers GJ, Pillay D, Parry CM. 2017 Full  
363 length HIV-1 Gag determines protease inhibitor susceptibility within *in*  
364 *vitro* assays. *AIDS.* Jul17;24(11):1615-1655.
- 365 15. Sridhar S, Forrest S, Kean I, Young J, Scott JB, Maes M, Pereira-Dias J,  
366 Parmar S, Routledge M, Rivett L, Dougan G, Weekes M, Curran M,  
367 Goodfellow I, Baker S. 2020. A blueprint for the implementation of a  
368 validated approach for the detection of SARS-Cov2 in clinical samples in  
369 academic facilities. bioRxiv <https://doi.org/10.1101/2020.04.14.041319>
- 370 16. Public Health England. 2017. UK Standards for Microbiology  
371 Investigations - Evaluations, validations and verifications of diagnostic tests.  
372 Issue no. 5, 16 March 2017
- 373 17. UK Legislation. Human Tissue Act. 2004.

- 374 18. Infection Prevention and Control guidance for Long-Term Care Facilities in the  
375 context of COVID-19: World Health Organisation. [updated 21 March 2020].  
376 Available from: <https://apps.who.int/iris/handle/10665/331508>. (Accessed 11  
377 May 2020).
- 378 19. FDA. 2020. Xpert® Xpress SARS-CoV-2 Instructions for Use, April 2020.  
379 <https://www.fda.gov/media/136314/download> (Accessed 10 May 2020).
- 380 20. FDA. 2020. Biomerieux ARGENE® SARS-CoV-2 R Gene® Instructions for  
381 Use, May 2020. <https://www.fda.gov/media/137742/download> (Accessed 10  
382 May 2020).
- 383 21. Zhen W, Smith E, Manj R, Schron D, Berry GJ. (2020) Clinical Evaluation of  
384 Three Sample-To-Answer Platforms for the Detection of SARS-CoV-2. J. Clin.  
385 Microbiol. Apr 24 DOI: [10.1128/JCM.00783-20](https://doi.org/10.1128/JCM.00783-20)
- 386 22. Smithgall MC, Scherberkova I, Whittier S, Green DA (2020) Comparison of  
387 Cepheid Xpert Xpress and Abbott ID Now to Roche cobas for the Rapid  
388 Detection of SARS-CoV-2. bioRxiv <https://doi.org/10.1101/2020.04.22.055327>.
- 389 23. Moran A, Beavis KG, Matushek SM, Ciaglia C, Francios N, Tesic V, Love N.  
390 2020. The Detection of SARS-CoV-2 using the Cepheid Xpert Xpress SARS-  
391 CoV-2 and Roche cobas SARS-CoV-2 Assays. J Clin Microbiol. Apr 17.  
392 doi: 10.1128/JCM.00772-2
- 393 24. Abbott. 2020. ID NOW COVID-19 Technical Brief and Sample Type Labelling  
394 Update. April 2020



395 **Figure 1. Viral inactivation as demonstrated by Luminescence from a VSV-G**  
 396 **pseudotyped reporter virus in descending concentrations of SAMBA Reagent**  
 397 **(SCoV Buffer).**

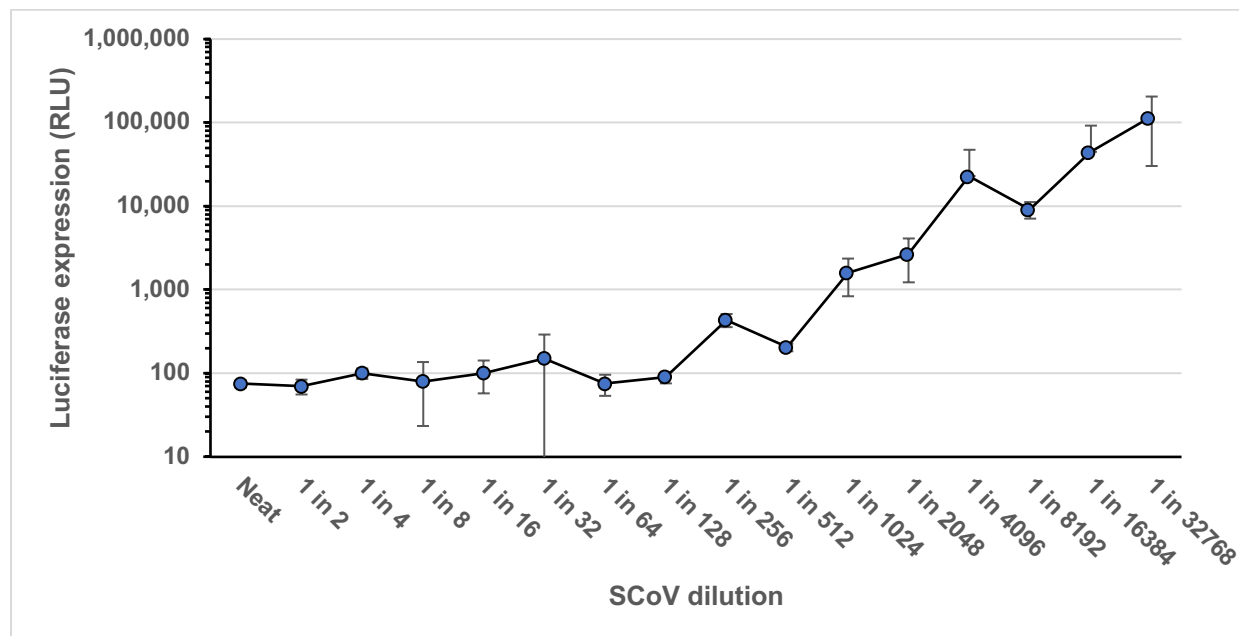

398

399

400

401

**Table 1. LOD of the SAMBA II SARS-CoV-2 Test**

| Concentration SARS-CoV-2<br>RNA (cp/mL) | Number<br>tested | Number<br>positive | % positive |
|-----------------------------------------|------------------|--------------------|------------|
| 750                                     | 3                | 3                  | 100        |
| 500                                     | 3                | 3                  | 100        |
| <b>250</b>                              | <b>20</b>        | <b>20</b>          | <b>100</b> |
| 200                                     | 3                | 2                  | 66.7       |
| 150                                     | 3                | 2                  | 66.7       |
| 100                                     | 3                | 0                  | 0          |

402

403

404

405

**Table 2. Clinical performance in 65 contrived clinical samples**

| <b>Concentration SARS-CoV-2 RNA<br/>(cp/mL)</b> | <b>Number<br/>tested</b> | <b>Number<br/>positive</b> | <b>% agreement<br/>(95% CI)</b> |
|-------------------------------------------------|--------------------------|----------------------------|---------------------------------|
| 1-2x LOD                                        | 20                       | 20                         | 100%<br>(86.1-100%)             |
| ≥3x LOD                                         | 10                       | 10                         | 100 %<br>(74.1-100%)            |
| Negative                                        | 35                       | 0                          | 100%<br>(91.5-100%)             |

406

407

**Table 3. Clinical performance in 172 clinical samples compared to PHE**

408

**reference test (initial results)**

|                         |                 | <b>PHE reference test</b> |                 |
|-------------------------|-----------------|---------------------------|-----------------|
|                         |                 | <b>POSITIVE</b>           | <b>NEGATIVE</b> |
| <b>SAMBA SARS-CoV-2</b> | <b>POSITIVE</b> | 87                        | 3               |
| <b>Test</b>             | <b>NEGATIVE</b> | 1                         | 81              |

409

410

411

412

413

414

**Table 4. Discrepant analysis of 4 samples**

| Sample ID | SAMBA          |               | PHE Colindale assay RdRp |             | PHE Wuhan Cambridge assay |             | Final result |
|-----------|----------------|---------------|--------------------------|-------------|---------------------------|-------------|--------------|
|           | Initial result | Repeat result | Initial (Ct)             | Repeat (Ct) | RdRp (Ct)                 | E (Ct)      |              |
| 1-25      | NEG            | NEG           | POS (31.18)              | Not tested  | POS (28.87)               | Not tested  | POS          |
| 2-17      | POS            | POS           | NEG                      | NEG         | NEG                       | POS (34.99) | POS          |
| 2-25      | POS            | POS           | NEG (36.58)              | POS (33.62) | NEG                       | NEG         | POS          |
| 2-38      | POS            | POS           | NEG                      | NEG         | POS (35.09)               | POS (34.06) | POS          |

415

416

417

**Table 5. Clinical performance in 172 clinical samples compared to PHE**

418

**reference test (after retest)**

|                       |          |    | PHE reference test |          |
|-----------------------|----------|----|--------------------|----------|
|                       |          |    | POSITIVE           | NEGATIVE |
| SAMBA SARS-CoV-2 Test | POSITIVE | 90 | 0                  |          |
|                       | NEGATIVE | 1  | 81                 |          |

419
